# Supplementary material for: CLINICOPATHOLOGIC CORRELATION OF GEOGRAPHIC ATROPHY SECONDARY TO AGE-RELATED MACULAR DEGENERATION
Source: PubMed Central journal article supplement (PMC6445604; doi:10.1097/iae.0000000000002461), 2019-02-06
Supplement: retina-39-802-s005.pdf [file retina-39-802-s005.pdf]

**Table S1. Atrophic length at fovea sections from GA database and the study eye.**

| GA border type | Total atrophic length ( $\mu\text{m}$ ) |                               |
|----------------|-----------------------------------------|-------------------------------|
|                | Absence of continuous RPE               | Distance between ELM descents |
| Multilobular   | 4694                                    | 4586                          |
| Multilobular   | 4246                                    | 4131                          |
| Multilobular   | 3245                                    | 3257                          |
| Multilobular   | 3137                                    | 3157                          |
| Multilobular   | 2821                                    | 2744                          |
| Multilobular   | 1347                                    | 1400                          |
| Multilobular   | 1196                                    | 1011                          |
| Multilobular   | <b>1127</b>                             | <b>965</b>                    |
| Unilobular     | 1650                                    | 1528                          |
| Unilobular     | 1040                                    | 679                           |
| Unilobular     | 1025                                    | 1038                          |
| Unilobular     | 891                                     | 891                           |
| Unilobular     | 709                                     | 691                           |
| Unilobular     | 525                                     | 301                           |

Lengths in bold are measured from the study eye.

Mean  $\pm$  SD ( $\mu\text{m}$ ): multilobular-2727  $\pm$  1385 (absence of continuous RPE), 2656  $\pm$  1397 (distance between ELM descents); unilobular-973  $\pm$  385 (absence of continuous RPE), 855  $\pm$  413 (distance between ELM descents).
