# Supplementary material for: CLINICOPATHOLOGIC CORRELATION OF GEOGRAPHIC ATROPHY SECONDARY TO AGE-RELATED MACULAR DEGENERATION
Source: PubMed Central journal article supplement (PMC6445604; doi:10.1097/iae.0000000000002461), 2019-02-06
Supplement: retina-39-802-s006.pdf [file retina-39-802-s006.pdf]

**Supplementary Table 2. RPE phenotypes and melanosome/lipofuscin granules in outer retina**

| Distance to ELM descent ( $\mu\text{m}$ ) | -500         | -100 | ↓<br>ELM descent | +100     | +500* |
|-------------------------------------------|--------------|------|------------------|----------|-------|
|                                           | Non-atrophic |      |                  | Atrophic |       |
| <b>RPE phenotypes, % of locations</b>     |              |      |                  |          |       |
| Non-uniform                               | 28.6         | 18.8 |                  | 0.0      | NA    |
| Very non-uniform                          | 57.1         | 43.8 |                  | 0.0      | NA    |
| Sloughed †                                | 0.0          | 25.0 |                  | 0.0      | NA    |
| Shedding                                  | 14.3         | 6.3  |                  | 0.0      | NA    |
| Bilaminar                                 | 0.0          | 0.0  |                  | 0.0      | NA    |
| Dissociated                               | 0.0          | 0.0  |                  | 56.3     | NA    |
| Intraretinal                              | 0.0          | 0.0  |                  | 0.0      | NA    |
| Atrophy with BLamD                        | 0.0          | 0.0  |                  | 43.8     | NA    |
| Atrophy without BLamD                     | 0.0          | 0.0  |                  | 0.0      | NA    |
| <b>M/L granules, % of locations</b>       |              |      |                  |          |       |
| No M/L granules                           | 100.0        | 87.5 |                  | 56.3     | NA    |
| M/L granules in OPL/HFL and/or ONL ‡      | 0.0          | 12.5 |                  | 43.8     | NA    |
| Absent OPL/HFL/ONL                        | 0.00         | 0.00 |                  | 0.00     | NA    |

Measured at 46 locations.

ELM, external limiting membrane; M/L, melanosome/lipofuscin; OPL, outer plexiform layer; HFL, Henle fiber layer; ONL, outer nuclear layer; RPE, retinal pigment epithelium.

\*The measurements at +500 are not available because the absence of a continuous RPE layer is less than 1000  $\mu\text{m}$ .

†The distribution of sloughed RPE in the comparison group (13 GA eyes) is 4.7% at -500  $\mu\text{m}$  and 10% at -100  $\mu\text{m}$ .

‡Data from our GA database: 22.9% at -500  $\mu\text{m}$ , 37.1% at -100  $\mu\text{m}$ , and 72.4% at +100  $\mu\text{m}$ .
