# Supplementary material for: CLINICOPATHOLOGIC CORRELATION OF GEOGRAPHIC ATROPHY SECONDARY TO AGE-RELATED MACULAR DEGENERATION
Source: PubMed Central journal article supplement (PMC6445604; doi:10.1097/iae.0000000000002461), 2019-02-06
Supplement: retina-39-802-s008.pdf [file retina-39-802-s008.pdf]

**Supplementary Table 4. Outer retinal cellular and laminar phenotypes and thicknesses**

| Distance to ELM descent, $\mu\text{m}$                | -500         | -100       | ↓<br>ELM descent | +100      | +500* | <i>p</i>          |
|-------------------------------------------------------|--------------|------------|------------------|-----------|-------|-------------------|
|                                                       | Non-atrophic |            |                  | Atrophic  |       |                   |
| <b>Ectopic photoreceptor nuclei, % of locations†</b>  |              |            |                  |           |       |                   |
| No ectopic nuclei                                     | 21.4         | 25.0       |                  | 43.8      | NA    | -                 |
| Ectopic nuclei in IS                                  | 64.3         | 37.5       |                  | 0.0       | NA    | -                 |
| Ectopic nuclei in OPL/HFL                             | 57.1         | 75.0       |                  | 56.3      | NA    | -                 |
| Absent OPL/HFL/ONL or dyslamination                   | 0.0          | 0.0        |                  | 0.0       | NA    | -                 |
| <b>ONL phenotypes, % of locations</b>                 |              |            |                  |           |       |                   |
| Unremarkable ONL                                      | 7.1          | 0.0        |                  | 0.0       | NA    | -                 |
| Thinned ONL                                           | 64.3         | 6.3        |                  | 0.0       | NA    | -                 |
| Retracted nuclei & mitochondria                       | 28.6         | 93.8       |                  | 37.5      | NA    | -                 |
| Dyslaminated HFL/ONL                                  | 0.0          | 0.0        |                  | 0.0       | NA    | -                 |
| ORT/ island                                           | 0.0          | 0.0        |                  | 0.0       | NA    | -                 |
| Absence of continuous ONL                             | 0.0          | 0.0        |                  | 62.5      | NA    | -                 |
| <b>ONL/ISmy thicknesses, <math>\mu\text{m}</math></b> |              |            |                  |           |       |                   |
| ONL thickness                                         | 20.1 ± 3.7   | 20.1 ± 4.8 |                  | 0.0 ± 0.0 | NA    | <b>&lt;0.0001</b> |
| ONL rows (Median, IQR)                                | 3, 0         | 2, 1       |                  | 0, 0      | NA    | -                 |
| ISmy thickness                                        | 5.0 ± 2.0    | 2.4 ± 2.1  |                  | 0.0 ± 0.0 | NA    | <b>&lt;0.0001</b> |

Measured at 46 locations.

OPL, outer plexiform layer; HFL, Henle fiber layer; ONL, outer nuclear layer; ELM, external limiting membrane; IS, inner segment; my, myoid; ORT, outer retinal tubulation; RPE, retinal pigment epithelium; IQR, interquartile range; NA, not available.

Most HFL were affected by post-mortem artifacts, so they are not included in this table.

P value in bold < 0.05.

\*The measurements at +500 are not available because the absence of a continuous RPE layer is less than 1000  $\mu\text{m}$ .

†These categories are not mutually exclusive, which means ectopic nuclei can locate in OPL/HFL and IS at the same time.
